# Supplementary material for: Visible light-enhanced thermal decomposition performance of ammonium perchlorate with a metal–organic framework-derived Ag-embedded porous ZnO nanocomposite
Source: Royal Society of Chemistry journal article supplement (doi:10.1039/c8nj04143a), 2018-01-01
Supplement: c8nj04143a1.pdf [file c8nj04143a1.pdf]

*New Journal of Chemistry*

*Supporting Information for:*

*Visible-Light-Enhanced Thermal Decomposition Performance  
of Ammonium Perchlorate with a Metal-Organic Framework  
Derived Ag-Embedded Porous ZnO Nanocomposites*

Jingfeng Wang,<sup>a</sup> Yang Li,<sup>a</sup> Yadong Qiao,<sup>a</sup> Guangzhi Yu,<sup>a</sup> Jinzhu Wu,<sup>a</sup> Liang Xu,<sup>c</sup>

Xiaohong Wu,<sup>\*a</sup> Wei Qin<sup>\*b</sup>

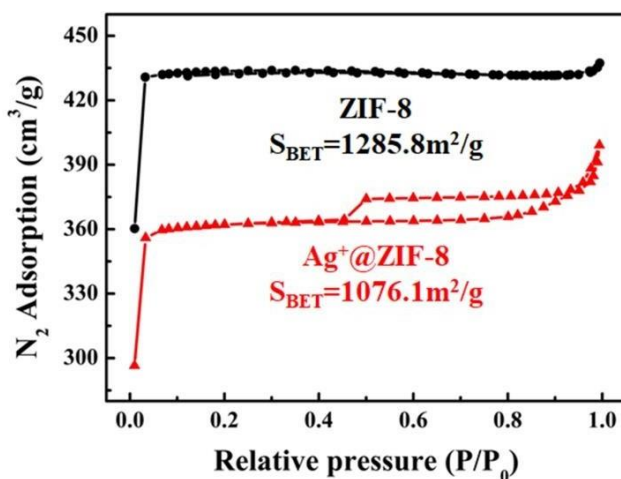

**Fig. S1** Nitrogen adsorption-desorption isotherms of ZIF-8 and Ag<sup>+</sup>@ZIF-8.

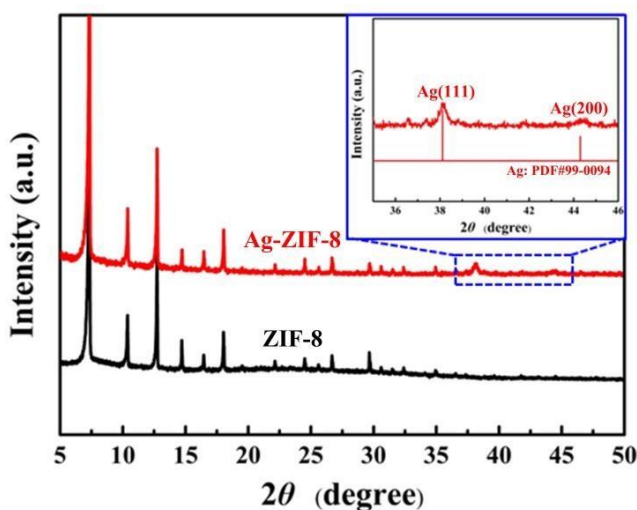

**Fig. S2** The XRD patterns of Ag-ZIF-8 and ZIF-8. Inset shows the zoom-in view of 35-46

degree of Ag-ZIF-8.

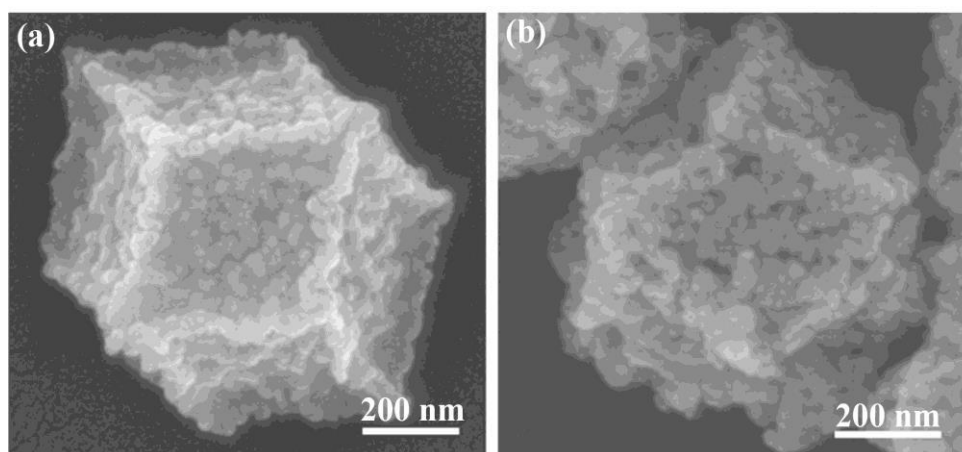

**Fig. S3** The SEM images of ZnO derived from ZIF-8(a) and Ag-ZnO NCs derived from Ag<sup>+</sup>@ZIF-8 (b) under same conditions.

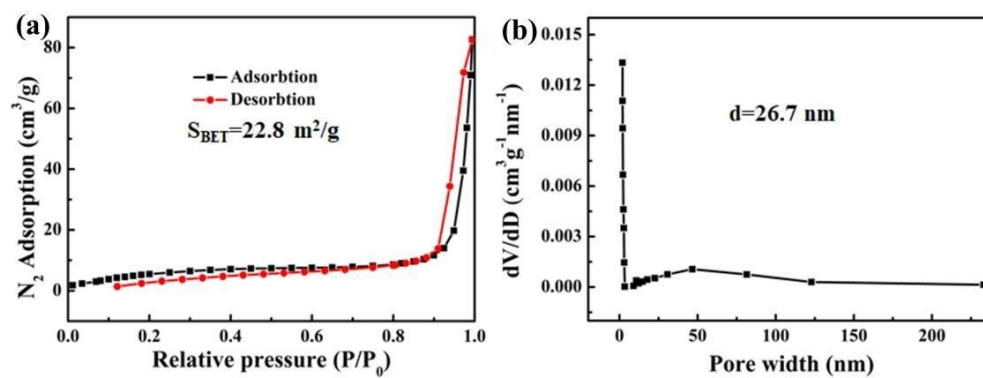

**Fig. S4** Nitrogen adsorption-desorption isotherms (a) and pore size distribution curve (b) of Ag-ZnO NCs.

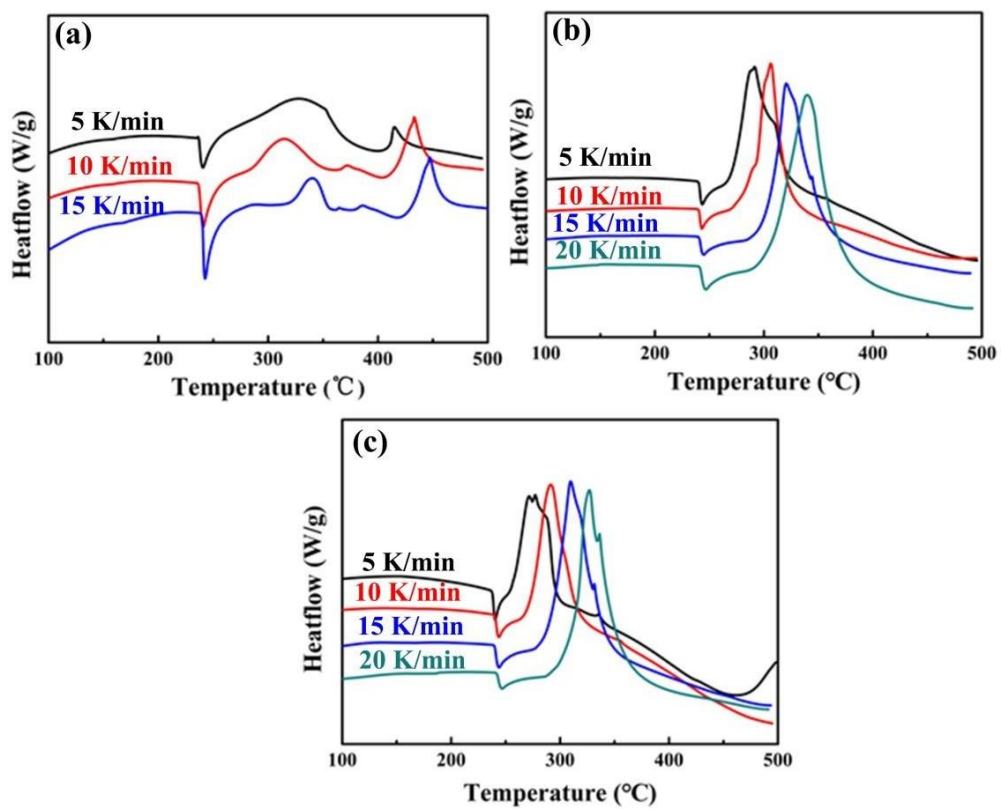

**Fig. S5** DSC curves of (a) pure AP, (b) AP mixture with ZnO and (c) AP mixture with Ag-ZnO NCs at different heating rates.
